# Supplementary material for: Dynamics of Antibodies to Ebolaviruses in an Eidolon helvum Bat Colony in Cameroon
Source: MDPI journal article supplement (doi:10.3390/v14030560), 2022-03-09
Supplement: s1 [file s1]

## SUPPLEMENTARY TABLES

**Supplementary table S1.** MFI cut-off values calculated with different methods as described in Methods section for the different Ebolavirus strains [Zaire (EBOV). Sudan (SUDV). Bundibugyo (BDBV) and Reston (RESTV)] and the different antigens used per virus. The assay used recombinant proteins of Nucleoprotein (NP). Viral Protein-40 (VP40) or Glycoprotein (GP) for different EBV lineages: Zaire (EBOV). Sudan (SUDV). Bundibugyo (BDBV) and Reston (RESTV). GP proteins from the Mayinga (GP-M) and the Kissidougou (GP-K) strain were used for EBOV. \*Mean of negatives was calculated on negative control samples (n=145) that were collected from captive-born insectivorous bats (*Carollia perspicillata*. n=103) hosted at the Zoo of Montpellier. France. and from two frugivorous species (*Pteropus giganteus*. n=19; *Rousettus aegyptiacus*. n=23) from the Zoo of Stuttgart, Germany, as described in De Nys et al, 2018. \*\*The other cut-offs were calculated on a sample set of wild captured bats from Guinee, Cameroon and DRC consisting of DBS samples from 8741 bats as described in Lacroix et al. 2021.

| Antigen    | Mean+4SD* | mean of the cutoffs** |
|------------|-----------|-----------------------|
| NP-EBOV    | 71        | 196                   |
| GP-EBOV-K  | 128       | 609                   |
| GP- EBOV-M | 307       | 707                   |
| VP40-EBOV  | 75        | 177                   |
| NP-SUDV    | 131       | 258                   |
| GP-SUDV    | 251       | 1896                  |
| VP40-SUDV  | 88        | 182                   |
| GP-BDBV    | 99        | 432                   |
| VP40-BDBV  | 363       | 664                   |
| GP-RESTV   | 249       | 140                   |

**Supplementary Table S2:** Distribution of *Eidolon helvum* bats per capture session with respect to sex and age.

| Date of sample collection | Adult females |        | Immature females |        | Juvenile females |        | Adult males |        | Immature males |        | Juvenile males |        | Total |
|---------------------------|---------------|--------|------------------|--------|------------------|--------|-------------|--------|----------------|--------|----------------|--------|-------|
|                           | n             | (%)    | n                | (%)    | n                | (%)    | n           | (%)    | n              | (%)    | n              | (%)    | N     |
| 5- 11/12 2018             | 10            | (50.0) | 0                | (0)    | 0                | (0)    | 10          | (50.0) | 0              | (0)    | 0              | (0)    | 20    |
| 19/1 - 1/2 2019           | 42            | (42.8) | 0                | (0)    | 0                | (0)    | 56          | (57.1) | 0              | (0)    | 0              | (0)    | 98    |
| 26/2 - 6/3 2019           | 8             | (47.1) | 0                | (0)    | 0                | (0)    | 9           | (52.9) | 0              | (0)    | 0              | (0)    | 17    |
| 28/3 - 5/4 2019           | 56            | (64.3) | 0                | (0)    | 6                | (6.9)  | 19          | (21.8) | 0              | (0)    | 6              | (6.9)  | 87    |
| 3- 11/5 2019              | 21            | (14.1) | 5                | (4.1)  | 57               | (38.5) | 2           | (1.3)  | 3              | (2.0)  | 60             | (40.5) | 148   |
| 12 - 20/6 2019            | 3             | (3.6)  | 0                | (0)    | 31               | (37.8) | 6           | (7.3)  | 1              | (1.2)  | 41             | (50.0) | 82    |
| 13 - 21/7 2019            | 15            | (11.4) | 42               | (31.8) | 11               | (8.3)  | 21          | (15.9) | 37             | (28.0) | 6              | (4.5)  | 132   |
| 14 - 22/9 2019            | 8             | (12.1) | 15               | (22.7) | 1                | (1.5)  | 16          | (24.2) | 26             | (39.4) | 0              | (0)    | 66    |
| 9 - 17/10 2019            | 5             | (10.6) | 10               | (21.3) | 0                | (0)    | 13          | (27.7) | 19             | (40.4) | 0              | (0)    | 47    |
| 29/10 - 6/11 2019         | 12            | (25.0) | 8                | (16.7) | 0                | (0)    | 15          | (31.2) | 13             | (27.1) | 0              | (0)    | 48    |
| 22 - 30/11 2019           | 14            | (18.7) | 24               | (32.0) | 0                | (0)    | 14          | (18.7) | 23             | (30.7) | 0              | (0)    | 75    |
| Total                     | 194           | (23.6) | 104              | (12.6) | 106              | (12.9) | 181         | (22.1) | 122            | (14.9) | 113            | (13.8) | 820   |

**Supplementary table S3a.** Numbers, percentages and 95% confidence intervals of *Eidolon helvum* bat samples reactive with the different Ebolavirus antigens according to sex and age and less-stringent cut-off ( 4 X Standard deviation of negative control samples).

| Antigen   | Adult females<br>(n=191) |                   | Adult males<br>(n=181) |                   | Juvenile females<br>(n=108) |                  | Juvenile males<br>(n=112) |                 | Immature females<br>(n=103) |                   | Immature males<br>(n=122) |                   |
|-----------|--------------------------|-------------------|------------------------|-------------------|-----------------------------|------------------|---------------------------|-----------------|-----------------------------|-------------------|---------------------------|-------------------|
|           | n+                       | (% ; CI 95%)      | n+                     | (% ; CI 95%)      | n+                          | (% ; CI 95%)     | n+                        | (% ; CI 95%)    | n+                          | (% ; CI 95%)      | n+                        | (% ; CI 95%)      |
| EBOV-NP   | 5                        | (2.6; 1.1-5.9)    | 10                     | (5.5; 3.0-9.9)    | 5                           | (4.63; 1.9-10.4) | 3                         | (2.7; 0.9-7.6)  | 4                           | (3.9; 1.5-9.6)    | 8                         | (6.6; 3.4-12.4)   |
| SUDV-NP   | 5                        | (2.6; 1.1-5.9)    | 5                      | (2.8; 1.2-6.3)    | 3                           | (2.8; 0.9-7.7)   | 4                         | (3.6; 1.40-8.8) | 0                           | (0.0-0.0)         | 3                         | (2.5; 0.8-6.9)    |
| EBOV-GP-K | 78                       | (40.8; 34.1-47.9) | 81                     | (44.8; 37.7-52.0) | 5                           | (4.6; 1.9-10.4)  | 2                         | (1.8; 0.5-6.3)  | 56                          | (54.4; 44.8-63.7) | 60                        | (49.2; 40.5-57.9) |
| EBOV-GP-M | 27                       | (14.1; 9.9-19.8)  | 34                     | (18.8;13.8-25.1)  | 1                           | (0.9; 0.2-5.1)   | 1                         | (0.9; 0.2-4.9)  | 38                          | (36.9; 28.2-46.5) | 37                        | (30.3; 22.9-38.9) |
| SUDV-GP   | 103                      | (53.9; 46.9-60.9) | 122                    | (67.4; 60.3-73.8) | 9                           | (8.3; 4.5-15.1)  | 9                         | (8.0; 4.3-14.6) | 74                          | (71.8; 62.5-79.6) | 84                        | (68.9; 60.2-76.4) |
| BDBV-GP   | 71                       | (37.2; 30.6-44.2) | 72                     | (39.8; 32.9-47.1) | 4                           | (3.70; 1.5-9.1)  | 3                         | (2.7; 0.9-7.6)  | 50                          | (48.5; 39.1-58.1) | 54                        | (44.3; 35.8-53.1) |
| EBOV-VP   | 1                        | (0.5; 0.1-2.9)    | 7                      | (3.9; 1.9-7.8)    | 3                           | (2.78; 0.9-7.9)  | 0                         | (0.0; 0.0-3.3)  | 6                           | (5.8; 2.7-12.1)   | 5                         | (4.1; 1.8-9.2)    |
| SUDV-VP   | 8                        | (4.2; 2.1-8.1)    | 10                     | (5.5; 3.0- 9.89)  | 4                           | (3.7; 1.5-9.1)   | 3                         | (2.7; 0.9-7.6)  | 16                          | (15.5; 9.8-23.8)  | 19                        | (15.5; 10.2-23.1) |
| BDBV-VP   | 0                        | (0.0 ; 0.0-0.0)   | 1                      | (0.6 ; 0.10-3.1)  | 0                           | (0.0 ; 0.0-0.0)  | 0                         | (0.0 ; 0.0-0.0) | 1                           | (0.9 ; 1.7-5.3)   | 0                         | (0.0 ; 0.0-0.0)   |

**Supplementary table S3b.** Numbers, percentages and 95% confidence intervals of *Eidolon helvum* bat samples reactive with the different Ebolavirus antigens according to sex and age with stringent (statistical methods) cut-offs.

| Antigen   | Adult females<br>(n=191) |                 | Adult males<br>(n=181) |                  | Juvenile females<br>(n=108) |                | Juvenile males<br>(n=112) |                | Immature females<br>(n=103) |                   | Immature males<br>(n=122) |                   |
|-----------|--------------------------|-----------------|------------------------|------------------|-----------------------------|----------------|---------------------------|----------------|-----------------------------|-------------------|---------------------------|-------------------|
|           | n+                       | (% ; CI 95%)    | n+                     | (% ; CI 95%)     | n+                          | (% ; CI 95%)   | n+                        | (% ; CI 95%)   | n+                          | (% ; CI 95%)      | n+                        | (% ; CI 95%)      |
| EBOV-NP   | 2                        | (1.1; 0.3-3.7)  | 2                      | (1.1; 0.30-3.9)  | 1                           | (0.9; 0.2-5.1) | 0                         | (0.0; 0.0-0.0) | 2                           | (1.9; 0.5-6.8)    | 1                         | (0.8; 0.1-4.5)    |
| SUDV-NP   | 0                        | (0.0; 0.0-0.0)  | 2                      | (1.1; 0.30-3.9)  | 2                           | (1.9; 0.5-6.5) | 2                         | (1.8; 0.5-6.3) | 0                           | (0.0; 0.0-0.0)    | 1                         | (0.8; 0.1-4.5)    |
| EBOV-GP-K | 7                        | (3.7; 1.8-7.4)  | 12                     | (6.6; 3.83-11.2) | 1                           | (0.9; 0.2-5.1) | 0                         | (0.0; 0.0-0.0) | 22                          | (21.4; 14.6-30.2) | 24                        | (19.7; 13.6-27.6) |
| EBOV-GP-M | 6                        | (3.1; 1.5-6.7)  | 5                      | (2.8; 1.2-6.3)   | 0                           | (0.0; 0.0-0.0) | 1                         | (0.9; 0.2-4.9) | 17                          | (16.5; 10.6-24.9) | 12                        | (9.8; 5.7-16.4)   |
| SUDV-GP   | 15                       | (7.9; 4.8-12.6) | 17                     | (9.4; 5.9-14.5)  | 3                           | (2.8; 0.9-7.9) | 0                         | (0.0; 0.0-0.0) | 24                          | (23.3; 16.2-32.3) | 35                        | (28.7; 21.4-37.3) |
| BDBV-GP   | 5                        | (2.6; 1.1-5.9)  | 5                      | (2.8; 1.2-6.3)   | 0                           | (0.0; 0.0-0.0) | 0                         | (0.0; 0.0-0.0) | 14                          | (13.6; 8.3-21.5)  | 13                        | (10.7; 6.3-17.4)  |
| EBOV-VP   | 1                        | (0.5; 0.1-2.9)  | 0                      | (0.0; 0.0-2.1)   | 0                           | (0.0; 0.0-0.0) | 0                         | (0.0; 0.0-0.0) | 2                           | (1.9; 0.5-6.8)    | 0                         | (0.0; 0.0-0.0)    |
| SUDV-VP   | 1                        | (0.5; 0.1-2.9)  | 2                      | (1.1; 0.3-3.9)   | 2                           | (1.9; 0.5-6.5) | 1                         | (0.9; 0.2-4.9) | 10                          | (9.7; 5.4-16.9)   | 8                         | (6.6; 3.4-12.4)   |
| BDBV-VP   | 0                        | (0.0; 0.0-0.0)  | 0                      | (0.0; 0.0-2.1)   | 0                           | (0.0; 0.0-0.0) | 0                         | (0.0; 0.0-0.0) | 0                           | (0.0; 0.0-0.0)    | 0                         | (0.0; 0.0-0.0)    |

**Supplementary table S4a.** Proportion, percentage and 95% confidence intervals of samples reactive with the different Ebolavirus antigens according to reproductive stage of adult female *Eidolon helvum* bats with less- stringent (4 X SD of negative samples) cut-off values.

| Antigen   | Gestation<br>(n=13) |                      | No gestation<br>(n=178) |                      | Lactation<br>(n=68) |                      | No lactation<br>(n=123) |                      |
|-----------|---------------------|----------------------|-------------------------|----------------------|---------------------|----------------------|-------------------------|----------------------|
|           | n+                  | (%; 95%CI)           | n+                      | (% ; CI 95%)         | n+                  | (% ; CI 95%)         | n+                      | (% ; CI 95%)         |
| EBOV-NP   | 0                   | (0.0; 0.0-0.0)       | 5                       | (2.81; 1.21-6.41)    | 2                   | (2.94; 0.81-10.10)   | 3                       | (2.44; 0.83-6.93)    |
| SUDV-NP   | 0                   | (0.0; 0.0-0.0)       | 5                       | (2.81; 1.21-6.41)    | 2                   | (2.94; 0.81-10.10)   | 3                       | (2.44; 0.83-6.93)    |
| EBOV-GP-K | 6                   | (46.15; 23.21-70.86) | 72                      | (40.45; 33.51-47.79) | 13                  | (19.12; 11.53-30.01) | 65                      | (52.85; 44.07-61.45) |
| EBOV-GP-M | 3                   | (23.08; 8.18-50.26)  | 24                      | (13.48; 9.23-19.28)  | 2                   | (2.94; 0.81-10.10)   | 25                      | (20.33; 14.16-28.28) |
| SUDV-GP   | 6                   | (46.15; 23.21-70.86) | 97                      | (54.49; 47.16-61.64) | 21                  | (30.88; 21;17-42;64) | 82                      | (66.67; 57.94-74.38) |
| BDBV-GP   | 5                   | (38.46; 17.71-64.48) | 66                      | (37.08; 30.33-44.38) | 12                  | (17.65; 10;39-28;36) | 59                      | (47.97; 39.33-56.72) |
| EBOV-VP   | 0                   | (0.0; 0.0-0.0)       | 1                       | (0.56; 0.10-3.11)    | 0                   | (0.0; 0.0-0.0)       | 1                       | (0.81; 0.14-4.46)    |
| SUDV-VP   | 0                   | (0.0; 0.0-0.0)       | 8                       | (4.49; 2.29-8.62)    | 3                   | (4.41; 1.51-12.19)   | 5                       | (4.07; 1.75-9.16)    |
| BDBV-VP   | 0                   | (0.0; 0.0-0.0)       | 0                       | (0.0; 0.0-0.0)       | 0                   | (0.0; 0.0-0.0)       | 0                       | (0.0; 0.0-0.0)       |

**Supplementary table S4b.** Proportion, percentage and 95% confidence intervals of samples reactive with the different Ebolavirus antigens according to reproductive stage of female adult *Eidolon helvum* bats with stringent (statistical methods, see methods) cut-off values.

| Antigen   | Gestation<br>(n=13) |                 | No gestation<br>(n=178) |                 | Lactation<br>(n=68) |                | No lactation<br>(n=123) |                  |
|-----------|---------------------|-----------------|-------------------------|-----------------|---------------------|----------------|-------------------------|------------------|
|           | n+                  | (%; 95%CI)      | n+                      | (% ; CI 95%)    | n+                  | (% ; CI 95%)   | n+                      | (% ; CI 95%)     |
| EBOV-NP   | 0                   | (0.0; 0.0-0.0)  | 2                       | (1.1; 0.3-4.0)  | 1                   | (1.5; 0.3-7.9) | 1                       | (0.8;0.1-4.5)    |
| SUDV-NP   | 0                   | (0.0; 0.0-0.0)  | 0                       | (0.0; 0.0-0.0)  | 0                   | (0.0; 0.0-0.0) | 0                       | (0.0; 0.0-0.0)   |
| EBOV-GP-K | 1                   | (7.7; 1.4-33.3) | 6                       | (3.4; 1.6-7.2)  | 1                   | (1.5; 0.3-7.9) | 6                       | (4.9; 2.3-10.2)  |
| EBOV-GP-M | 1                   | (7.7; 1.4-33.3) | 5                       | (2.8; 1.2-6.4)  | 0                   | (0.0; 0.0-0.0) | 6                       | (4.9; 2.3-10.2)  |
| SUDV-GP   | 1                   | (7.7; 1.4-33.3) | 14                      | (7.9; 4.7-12.8) | 1                   | (1.5; 0.3-7.9) | 14                      | (11.4; 6.9-18.2) |
| BDBV-GP   | 1                   | (7.7; 1.4-33.3) | 4                       | (2.3; 0.9-5.6)  | 0                   | (0.0; 0.0-0.0) | 5                       | (4.1; 1.8-9.2)   |
| EBOV-VP   | 0                   | (0.0; 0.0-0.0)  | 1                       | (0.6; 0.1-3.1)  | 0                   | (0.0; 0.0-0.0) | 1                       | (0.8; 0.1-4.5)   |
| SUDV-VP   | 0                   | (0.0; 0.0-0.0)  | 1                       | (0.6; 0.1-3.1)  | 0                   | (0.0; 0.0-0.0) | 1                       | (0.8; 0.1-4.5)   |
| BDBV-VP   | 0                   | (0.0; 0.0-0.0)  | 0                       | (0.0; 0.0-0.0)  | 0                   | (0.0; 0.0-0.0) | 0                       | (0.0; 0.0-0.0)   |
